# Supplementary material for: CXCL16 suppresses liver metastasis of colorectal cancer by promoting TNF-α-induced apoptosis by tumor-associated macrophages
Source: PubMed Central journal article supplement (PMC4300614; doi:10.1186/1471-2407-14-949), 2014-12-15
Supplement: 12885_2014_5116_MOESM1_ESM.pdf [file 12885_2014_5116_MOESM1_ESM.pdf]

## Additional files

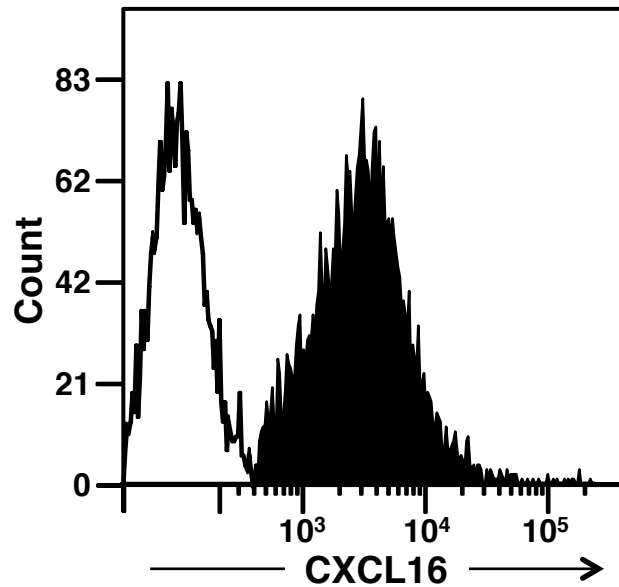

### Additional file 1: Expression of membrane-bound CXCL16 on SL4-CXCL16 cells

SL4-CXCL16 cells were incubated with goat anti-mouse CXCL16 mAb (R&D Systems, Minneapolis, MN, USA), or with control goat IgG (R&D Systems). FITC conjugated rabbit anti-goat IgG (MP Bio Japan, Tokyo, Japan) was used as the second antibody. FITC-labeled cells were then analyzed by flow cytometric analysis using FACSCanto (BD Biosciences, San Diego, CA, USA). FACS profiles by control goat IgG (open area) and anti-mouse CXCL16 mAb (shaded area) are shown.
