# Supplementary material for: CXCL16 suppresses liver metastasis of colorectal cancer by promoting TNF-α-induced apoptosis by tumor-associated macrophages
Source: PubMed Central journal article supplement (PMC4300614; doi:10.1186/1471-2407-14-949), 2014-12-15
Supplement: 12885_2014_5116_MOESM2_ESM.pdf [file 12885_2014_5116_MOESM2_ESM.pdf]

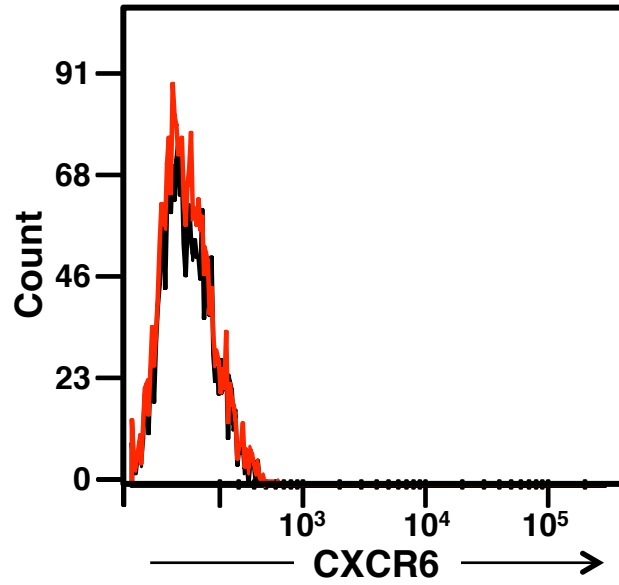

**Additional file 2: Expression of CXCR6 on SL4-CXCL16 cells**

SL4-CXCL16 cells were incubated with FITC conjugated rat anti-mouse CXCR6 mAb (R&D Systems, Minneapolis, MN, USA), or with FITC conjugated control rat IgG (R&D Systems). FACS profiles by control rat IgG (black line) and anti-mouse CXCR6 mAb (red line) are shown.
