# Supplementary material for: CXCL16 suppresses liver metastasis of colorectal cancer by promoting TNF-α-induced apoptosis by tumor-associated macrophages
Source: PubMed Central journal article supplement (PMC4300614; doi:10.1186/1471-2407-14-949), 2014-12-15
Supplement: 12885_2014_5116_MOESM3_ESM.pdf [file 12885_2014_5116_MOESM3_ESM.pdf]

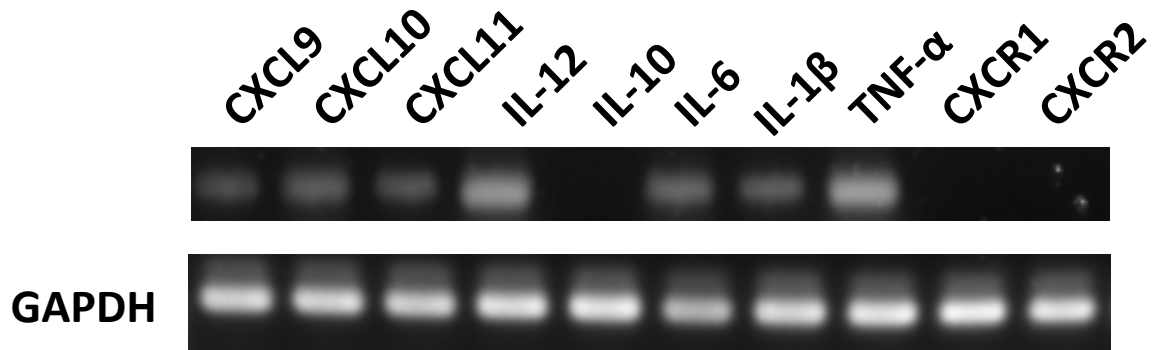

**Additional file 3: mRNA level of M1 and M2 macrophage markers in RAW 264.7 cells.**

RT-PCR analysis was performed for identification of RAW 264.7 cells phenotype. Briefly, RAW 264.7 cells were seeded in 6-well plate and incubated 24 h without stimulation. Cells were harvested using scraper and total RNA were extracted. GAPDH was used as the normalization control. The primer sequences are shown in methods and additional file 4.
