# Supplementary material for: CXCL16 suppresses liver metastasis of colorectal cancer by promoting TNF-α-induced apoptosis by tumor-associated macrophages
Source: PubMed Central journal article supplement (PMC4300614; doi:10.1186/1471-2407-14-949), 2014-12-15
Supplement: 12885_2014_5116_MOESM4_ESM.pdf [file 12885_2014_5116_MOESM4_ESM.pdf]

**Additional file 4: Sequences of the RT-PCR primers**

| Genes        | Forward (5'-3')      | Reverse (5'-3')        |
|--------------|----------------------|------------------------|
| CXCL9        | CTTTTCCTCTTGGGCATCAT | GCATCGTGCATTCCTTATCA   |
| CXCL10       | GCTGCCGTCATTTTCTGC   | TCTCACTGGCCCGTCATC     |
| CXCL11       | GCTGCTGAGATGAACAGGAA | CCCTGTTTGAACATAAGGAAGC |
| IL-12        | GACTCCAGGGGACAGGCTA  | CCAGGAGATGGTTAGCTTCTGA |
| IL-10        | CAGAGCCACATGCTCCTAGA | TGTCCAGCTGGTCCTTTGTT   |
| IL-1 $\beta$ | AGTTGACGGACCCCAAAAG  | AGCTGGATGCTCTCATCAGG   |
| CXCR1        | TTCTGAGCTTGCTGGGAAAC | GGGTCCTTCGCCTGTATAAGA  |
| CXCR2        | CAGGACCAGGAATGGGAGTA | TCCCCTCAAATATCCCCTA    |
